# Supplementary material
Source: PubMed Central journal article supplement (PMC6486837)
Supplement: NIHMS1015232-supplement-2.pdf [file NIHMS1015232-supplement-2.pdf]

| Supplementary Material A                                  |      |      |      |       |       |       |       |       |       |       |       |       |
|-----------------------------------------------------------|------|------|------|-------|-------|-------|-------|-------|-------|-------|-------|-------|
| Additional Patient Demographics based on Annual Inclusion |      |      |      |       |       |       |       |       |       |       |       |       |
| Year                                                      | 2005 | 2006 | 2007 | 2008  | 2009  | 2010  | 2011  | 2012  | 2013  | 2014  | 2015  | 2016  |
| <b>Age (average)</b>                                      | 57   | 58   | 59   | 59    | 60    | 60    | 60    | 60    | 59    | 60    | 60    | 60    |
| <b>Race</b>                                               |      |      |      |       |       |       |       |       |       |       |       |       |
| White                                                     | 1303 | 4423 | 8113 | 9542  | 11802 | 11594 | 11624 | 13627 | 16070 | 17191 | 18574 | 19961 |
| Black or African American                                 | 167  | 548  | 1058 | 1329  | 1672  | 1667  | 1760  | 1971  | 2347  | 2627  | 2666  | 3083  |
| American Indian or Alaskan Native                         | 36   | 39   | 70   | 70    | 83    | 84    | 90    | 75    | 109   | 105   | 121   | 104   |
| Asian/ Pacific Islander/ Native/ Hawaiian                 | 30   | 141  | 294  | 411   | 603   | 684   | 829   | 1071  | 1224  | 1156  | 1330  | 1370  |
| Not reported                                              | 266  | 939  | 1142 | 1153  | 1259  | 1388  | 1487  | 2051  | 2428  | 2428  | 3296  | 4699  |
| <b>Hispanic-Ethnicity</b>                                 |      |      |      |       |       |       |       |       |       |       |       |       |
| Hispanic                                                  | 84   | 303  | 441  | 487   | 708   | 770   | 844   | 1067  | 1262  | 1391  | 1533  | 1703  |
| <b>Smokers</b>                                            |      |      |      |       |       |       |       |       |       |       |       |       |
|                                                           | 273  | 854  | 1462 | 1841  | 2137  | 2009  | 1891  | 2194  | 2584  | 2841  | 2950  | 3234  |
| <b>Diabetic</b>                                           |      |      |      |       |       |       |       |       |       |       |       |       |
| No                                                        | 1625 | 5545 | 9611 | 11207 | 13729 | 13690 | 13973 | 16520 | 19488 | 20538 | 22653 | 25306 |
| Insulin                                                   | 51   | 169  | 345  | 400   | 452   | 478   | 549   | 643   | 772   | 872   | 961   | 1148  |
| Non-Insulin                                               | 126  | 376  | 721  | 898   | 1238  | 1249  | 1301  | 1632  | 1918  | 2123  | 2373  | 2733  |
| <b>Admission Status</b>                                   |      |      |      |       |       |       |       |       |       |       |       |       |
| Inpatient                                                 | 884  | 2720 | 4776 | 6172  | 7211  | 6964  | 6956  | 77691 | 7877  | 7200  | 7540  | 7679  |
| Outpatient                                                | 918  | 3370 | 5901 | 6333  | 8208  | 8453  | 8867  | 11104 | 14301 | 16333 | 18447 | 21508 |

| Supplementary Material B                                     |                                                              |               |                                                 |                                    |               |
|--------------------------------------------------------------|--------------------------------------------------------------|---------------|-------------------------------------------------|------------------------------------|---------------|
| CPT Codes use to Categorize Breast Cancer Intervention       |                                                              |               |                                                 |                                    |               |
| Group                                                        | CPT Code                                                     | Category (CG) | Group                                           | CPT Code                           | Category (CG) |
| <b>Group 1:</b><br><b>Breast Conservative Surgery</b>        | 19160                                                        | 1             | <b>Group 2:</b><br><b>Oncoplastic Surgery</b>   | 14000                              | 2             |
|                                                              | 19162                                                        |               |                                                 | 14001                              | 2             |
|                                                              | 19301                                                        |               |                                                 | 14300-01                           | 2             |
|                                                              | 19302                                                        |               |                                                 | 14302                              | 2             |
| <b>Group 3:</b><br><b>Mastectomy</b>                         | 19180                                                        | 5             | <b>(Any Group 1 CPT Code plus one of these)</b> | 19366                              | 3             |
|                                                              | 19182                                                        | 5             |                                                 | 19316                              | 3             |
|                                                              | 19303                                                        | 5             |                                                 | 19318                              | 3             |
|                                                              | 19304                                                        | 5             |                                                 | Any Breast Reconstruction CPT Code | 4**           |
|                                                              | 19240                                                        | 6             | <b>Breast Reconstruction</b>                    | 19340, 19342                       | 7*            |
|                                                              | 19200                                                        | 6             |                                                 | 19357, 15777                       | 7*            |
|                                                              | 19220                                                        | 6             |                                                 | 19361                              | 8*            |
|                                                              | 19305                                                        | 6             |                                                 | 19367                              | 9*            |
|                                                              | 19306                                                        | 6             |                                                 | 19368                              | 9*            |
|                                                              | 19307                                                        | 6             |                                                 | 19369                              | 9*            |
| <b>Group 4:</b><br><b>Mastectomy + Breast Reconstruction</b> | Any Group 2 CPT code plus any Breast Reconstruction CPT Code |               | *Four groups                                    |                                    |               |
|                                                              |                                                              |               | 19364                                           | 10*                                |               |
|                                                              |                                                              |               | 19366                                           | 10*                                |               |
|                                                              |                                                              |               |                                                 | 15734, 15740, 15757                | 10            |

\*CG reference to any patient undergoing a Mastectomy with breast reconstruction (Group 4)

\*\*Patients with OS (CG4) were categorized based on any patient in Group 1 and any corresponding CPT code in the breast reconstruction section

| Supplementary Material C |                    |               |           |           |
|--------------------------|--------------------|---------------|-----------|-----------|
| Data from NSQIP database |                    |               |           |           |
| Year                     | Total Participants | Breast Cancer | Exclusion | Inclusion |
| <b>2005</b>              | 33930              | 2366          | 590       | 1776      |
| <b>2006</b>              | 118560             | 7789          | 1699      | 6090      |
| <b>2007</b>              | 211407             | 13431         | 2754      | 10677     |
| <b>2008</b>              | 271368             | 15413         | 2908      | 12505     |
| <b>2009</b>              | 336190             | 18858         | 3439      | 15419     |
| <b>2010</b>              | 363431             | 18792         | 3375      | 15417     |
| <b>2011</b>              | 442149             | 19234         | 3411      | 15823     |
| <b>2012</b>              | 545071             | 41734         | 22939     | 18795     |
| <b>2013</b>              | 651490             | 26163         | 3985      | 22178     |
| <b>2014</b>              | 750397             | 27828         | 4295      | 23533     |
| <b>2015</b>              | 885502             | 30628         | 4641      | 25987     |
| <b>2016</b>              | 1000393            | 34162         | 4975      | 29187     |
| <b>Total</b>             | 5609888            | 256398        | 59011     | 197387    |

All patients in NSQIP database by year and of those patients included in our study.

### Trend of Overall Breast Cancer Surgery

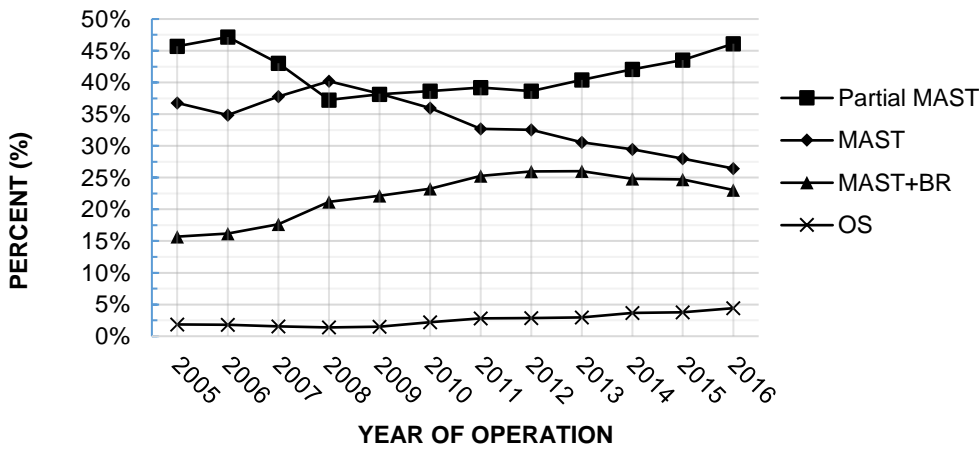

### Trend of DCIS intervention

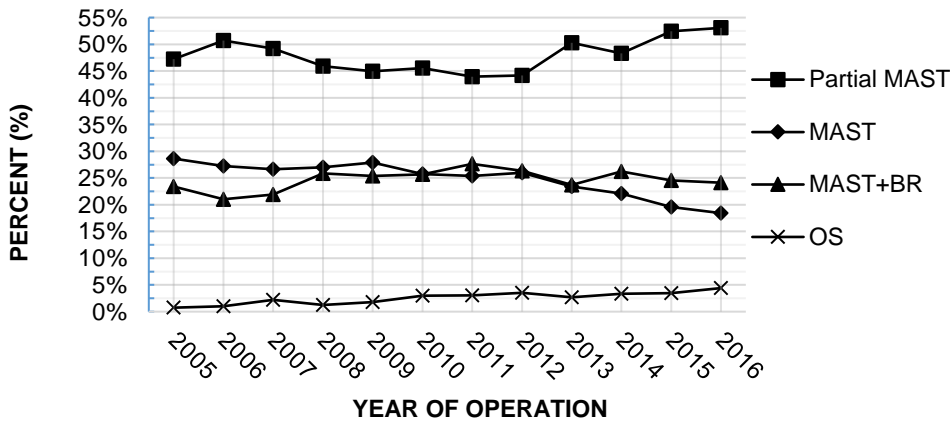

### Trend of Invasive Cancer Intervention

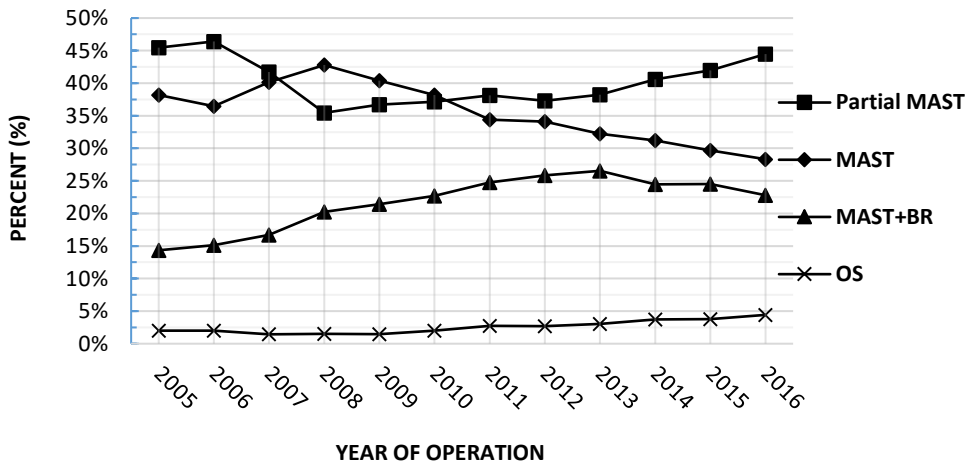

**Supplementary Material D: Graph 1**

PM: Partial Mastectomy; M: including either Simple, Subcutaneous, Radical or Modified Radical Mastectomy; M+R: Mastectomy including Breast reconstruction; OS: Oncoplastic Surgery

| Supplementary Material E                            |           |              |              |     |     |              |                |                |     |     |     |
|-----------------------------------------------------|-----------|--------------|--------------|-----|-----|--------------|----------------|----------------|-----|-----|-----|
| Categorical Analysis of Interventions in each Group |           |              |              |     |     |              |                |                |     |     |     |
| Groups→                                             | Total no. | 1. PM        | 2. OS        |     |     | 3. M         |                | 4. M+R         |     |     |     |
| Surgical Categories**→                              |           | 1            | 2            | 3   | 4   | 5            | 6              | 7              | 8   | 9   | 10  |
| <b>2005</b>                                         | 1776      |              |              |     |     |              |                |                |     |     |     |
| DCIS                                                | 269       | 127          | 0            | 2   | 0   | 61           | 16             | 43             | 5   | 11  | 4   |
| INV                                                 | 1507      | 696          | 24           | 3   | 4   | 280          | 280            | 143            | 18  | 46  | 13  |
| <b>2006</b>                                         | 6090      |              |              |     |     |              |                |                |     |     |     |
| DCIS                                                | 1072      | 545          | 5            | 3   | 3   | 205          | 85             | 152            | 29  | 33  | 12  |
| INV                                                 | 5018      | 2328         | 52           | 25  | 23  | 839          | 992            | 515            | 81  | 128 | 35  |
| <b>2007</b>                                         | 10677     |              |              |     |     |              |                |                |     |     |     |
| DCIS                                                | 1876      | 925          | 5            | 24  | 12  | 389          | 109            | 314            | 18  | 59  | 21  |
| INV                                                 | 8801      | 3680         | 41           | 52  | 34  | 1672         | 1854           | 1122           | 80  | 210 | 56  |
| <b>2008</b>                                         | 12505     |              |              |     |     |              |                |                |     |     |     |
| DCIS                                                | 2099      | 967          | 2            | 18  | 4   | 467          | 99             | 430            | 24  | 61  | 27  |
| INV                                                 | 10406     | 3702         | 47           | 64  | 35  | 2196         | 2259           | 1617           | 152 | 221 | 113 |
| <b>2009</b>                                         | 15419     |              |              |     |     |              |                |                |     |     |     |
| DCIS                                                | 2655      | 1194         | 12           | 27  | 8   | 567          | 174            | 526            | 47  | 60  | 40  |
| INV                                                 | 12764     | 4688         | 56           | 97  | 32  | 2543         | 2611           | 2155           | 184 | 214 | 184 |
| <b>2010</b>                                         | 15417     |              |              |     |     |              |                |                |     |     |     |
| DCIS                                                | 2745      | 1251         | 27           | 41  | 14  | 579          | 128            | 584            | 30  | 56  | 35  |
| INV                                                 | 12672     | 4705         | 93           | 119 | 43  | 2366         | 2470           | 2365           | 136 | 195 | 180 |
| <b>2011</b>                                         | 15823     |              |              |     |     |              |                |                |     |     |     |
| DCIS                                                | 2976      | 1298         | 44           | 29  | 17  | 597          | 152            | 636            | 58  | 60  | 85  |
| INV                                                 | 12847     | 4897         | 160          | 140 | 54  | 2293         | 2123           | 2586           | 135 | 182 | 277 |
| <b>2012</b>                                         | 18795     |              |              |     |     |              |                |                |     |     |     |
| DCIS                                                | 3635      | 1605         | 44           | 54  | 29  | 729          | 216            | 731            | 45  | 41  | 141 |
| INV                                                 | 15160     | 5661         | 173          | 185 | 50  | 2833         | 2336           | 3192           | 173 | 152 | 405 |
| <b>2013</b>                                         | 22178     |              |              |     |     |              |                |                |     |     |     |
| DCIS                                                | 4318      | 2032         | 40           | 57  | 11  | 717          | 210            | 1035           | 46  | 40  | 130 |
| INV                                                 | 17860     | 6824         | 190          | 275 | 76  | 3182         | 2572           | 3917           | 186 | 139 | 499 |
| <b>2014</b>                                         | 23533     |              |              |     |     |              |                |                |     |     |     |
| DCIS                                                | 4547      | 2198         | 65           | 69  | 19  | 811          | 194            | 1007           | 42  | 36  | 106 |
| INV                                                 | 18986     | 7707         | 345          | 281 | 80  | 3319         | 2615           | 3900           | 155 | 130 | 454 |
| <b>2015</b>                                         | 25987     |              |              |     |     |              |                |                |     |     |     |
| DCIS                                                | 4887      | 2567         | 76           | 79  | 14  | 788          | 166            | 1000           | 37  | 25  | 135 |
| INV                                                 | 21100     | 8860         | 316          | 400 | 81  | 3678         | 2589           | 4377           | 198 | 114 | 487 |
| <b>2016</b>                                         | 29187     |              |              |     |     |              |                |                |     |     |     |
| DCIS                                                | 5562      | 2952         | 127          | 97  | 21  | 829          | 194            | 1112           | 44  | 29  | 157 |
| INV                                                 | 23625     | 10506        | 464          | 454 | 127 | 3989         | 2703           | 4644           | 172 | 96  | 470 |
| <b>Overall P-Value (R<sup>2</sup>)</b>              |           | 0.001 (0.90) | 0.001 (0.90) |     |     | 0.047 (0.46) | <0.0001 (0.96) | <0.0001 (0.93) |     |     |     |
| <b>DCIS P-Value (R<sup>2</sup>)</b>                 |           | 0.001 (0.74) | 0.001 (0.74) |     |     | 0.005 (0.61) | 0.034 (0.44)   | 0.0002 (0.88)  |     |     |     |
| <b>INV P-Value (R<sup>2</sup>)</b>                  |           | 0.001 (0.88) | 0.001 (0.88) |     |     | 0.63 (0.10)  | (0.95)         | <0.0001 (0.92) |     |     |     |

Supplementary E Legend:

PM: *Partial Mastectomy*; M: *including either Simple, Subcutaneous, Radical or Modified Radical Mastectomy*; M +R: *Mastectomy including Breast reconstruction*; OS: *Oncoplastic Surgery*

\*\*

1. *PM: Partial Mastectomy*
2. *Level 1 Oncoplastic Surgery*
3. *Level Oncoplastic Surgery*
4. *Volume Replacement Oncoplastic Surgery (breast prosthesis, muscular flap, breast reconstruction)*
5. *Simple Mastectomy, Subcutaneous Mastectomy*
6. *Radical mastectomy*
7. *Mastectomy with breast prosthesis, delayed insertion or tissue expander following mastopexy*
8. *Mastectomy with Latissimus dorsi flap*
9. *Mastectomy with transverse rectus abdominis myocutaneous (TRAM) flap*
10. *Mastectomy with other type of breast reconstruction*
